# Supplementary material for: Guanidinoacetic Acid Supplementation Promotes Skeletal Muscle Fiber Type Transformation from Fast-to-Slow-Twitch via Increasing the PPARGC1A Based Mitochondrial Function and CaN/NFAT Pathway in Finishing Pigs
Source: MDPI journal article supplement (doi:10.3390/agriculture12010087), 2022-01-10
Supplement: s1 [file s1]

## Supplementary materials

We have displayed it as follows,hoping for your agreement.

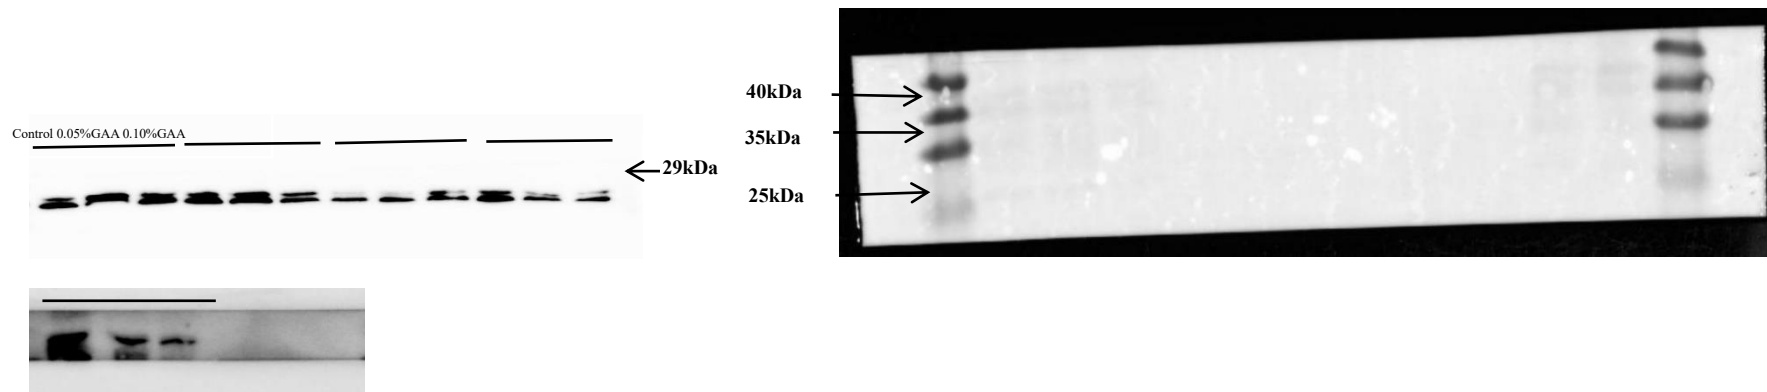

**Figure S1.** Effects of guanidinoacetic acid supplementation on the expressions of Troponin T3 of longissimus thoracis muscle in finishing pigs (n=5)

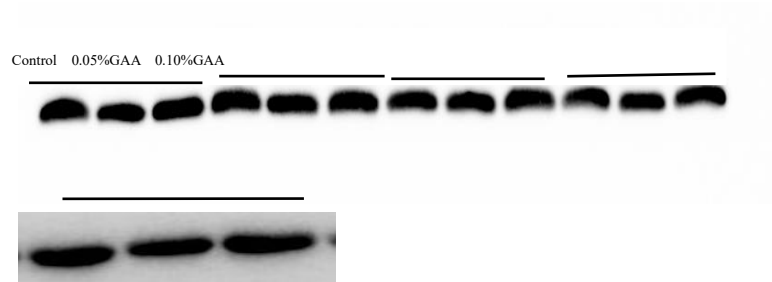

GAPDH

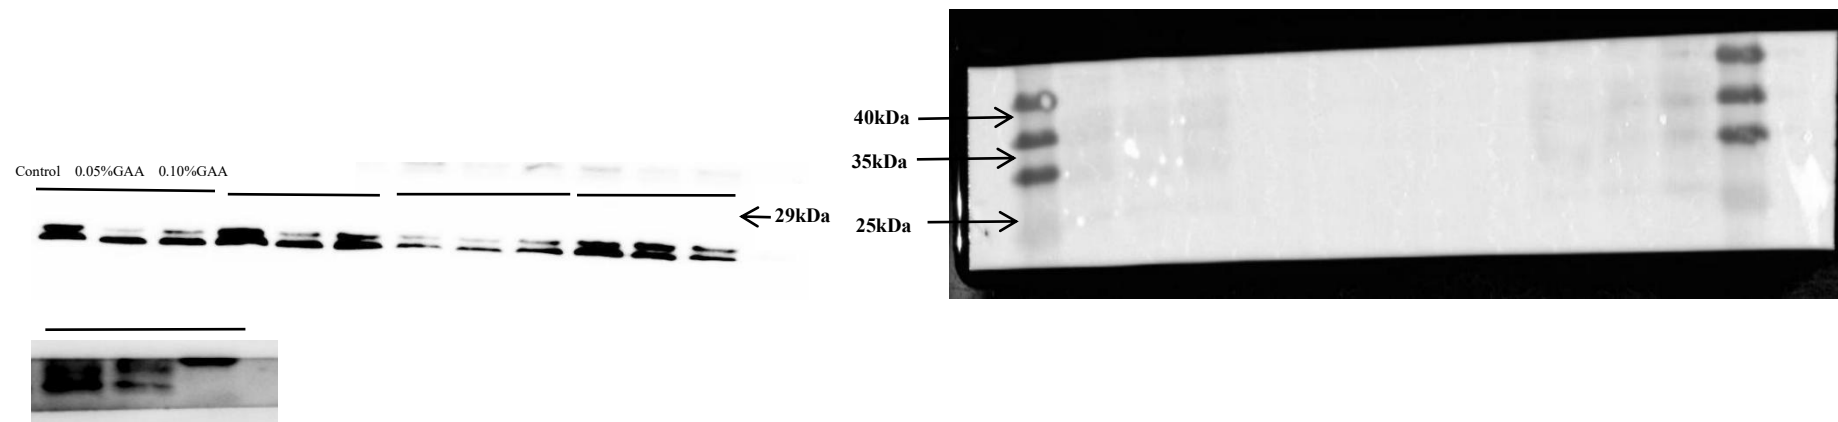

**Figure S2.** Effects of guanidinoacetic acid supplementation on the expressions of Troponin T3 in *semitendinosus* muscle in finishing pigs. (n=5)

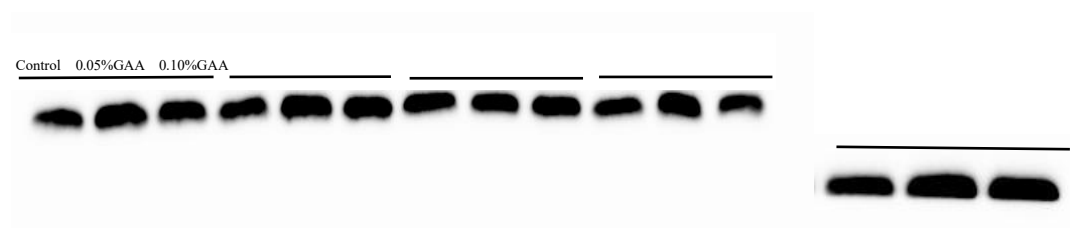

GAPDH
